# Supplementary material for: Thalamo-Cortical Activation and Connectivity During Response Preparation in Adults With Persistent and Remitted ADHD
Source: Atypon-hosted journal article supplement (doi:10.1176/appi.ajp.2013.12070880), 2013-09-01
Supplement: 1011_ds001.pdf [file 1011_ds001.pdf]

**Supplemental Table 1. Regions of Significant Activation During Response Preparation**

| Contrast                      | Region                                                 | BA   | Cluster Size | MNI Coordinates |     |     | t     |
|-------------------------------|--------------------------------------------------------|------|--------------|-----------------|-----|-----|-------|
|                               |                                                        |      |              | X               | Y   | Z   |       |
| <b>Controls: Cue – NonCue</b> |                                                        |      |              |                 |     |     |       |
|                               | Anterior Cingulate Cortex                              | 24   |              | -4              | 2   | 48  | 14.57 |
|                               | Supplementary Motor Area                               | 6    | 29859        | -2              | -2  | 60  | 12.56 |
|                               | Dorsolateral Prefrontal Cortex                         | 9    | 1323         | -36             | 32  | 30  | 8.13  |
|                               | Superior Temporal Gyrus                                | 22   | 1113         | 52              | -26 | -10 | 4.84  |
|                               | Inferior Temporal Gyrus                                | 20   | 107          | -54             | -32 | -12 | 4.43  |
|                               | Lingual Gyrus                                          | 18   | 542          | -8              | -76 | 4   | 3.84  |
|                               | Cuneus                                                 | 17   | 160          | -22             | -90 | 14  | 3.29  |
|                               | Cerebellum                                             | --   | 1637         | 34              | -42 | -34 | 6.66  |
| <b>Probands: Cue- Noncue</b>  |                                                        |      |              |                 |     |     |       |
|                               | Anterior Cingulate Cortex/<br>Supplementary Motor Area | 32/6 |              | -4              | 6   | 52  | 10.32 |
|                               | Putamen                                                | --   | 16704        | -22             | -2  | 4   | 8.89  |
|                               | Inferior Parietal Lobule                               | 40   | 1680         | 36              | -48 | 44  | 5.58  |
|                               | Superior Temporal Gyrus                                | 21   | 355          | 52              | -26 | -6  | 5.89  |
|                               | Middle Temporal Gyrus                                  | 21   | 161          | -48             | -34 | -4  | 3.24  |
|                               | Cerebellum                                             | --   | 681          | 14              | -46 | -20 | 4.99  |

Note.  $p < .01$ , with the extent threshold fixed at  $k = 100$  voxels.

**Supplemental Table 2. Regions of significantly greater functional connectivity with right thalamus during cues relative to non-cues.**

| Region                         | BA | Cluster Size | MNI Coordinates |     |     | t    |
|--------------------------------|----|--------------|-----------------|-----|-----|------|
|                                |    |              | X               | Y   | Z   |      |
| <b>Controls:</b>               |    |              |                 |     |     |      |
| Inferior Frontal Gyrus         | 45 | 699          | -52             | 26  | 12  | 3.73 |
| Dorsolateral Prefrontal Cortex | 46 |              | -40             | 50  | 10  | 3.46 |
| Inferior Frontal Gyrus         | 10 | 147          | 50              | 46  | -2  | 3.46 |
| Postcentral Gyrus              | 43 | 1322         | 66              | -18 | 18  | 4.41 |
| Superior Temporal Gyrus        | 22 | 260          | 60              | -52 | 16  | 3.91 |
| Middle Temporal Gyrus          | 39 | 3995         | -48             | -62 | 24  | 5.09 |
| Paracentral Lobule             | 6  | 116          | 4               | -36 | 74  | 3.53 |
| <b>Probands:</b>               |    |              |                 |     |     |      |
| Superior Temporal Gyrus        | 22 | 829          | -60             | -8  | 8   | 4.68 |
| Inferior Frontal Gyrus         | 47 |              | -48             | 22  | -6  | 3.12 |
| Medial Frontal Gyrus           | 6  | 793          | -2              | -20 | 76  | 4.62 |
| Medial Frontal Gyrus           | 10 | 389          | 0               | 52  | -12 | 4.21 |
| Anterior Cingulate Cortex      | 32 |              | 4               | 36  | -6  | 2.75 |
| Precentral Gyrus               | 6  | 152          | 62              | 2   | 8   | 3.23 |
| Middle Temporal Gyrus          | 21 | 191          | -58             | -36 | -6  | 3.76 |

Note.  $p < .01$ , with the extent threshold fixed at  $k = 100$  voxels.
